# Supplementary material for: Multidimensional hybrid conductive nanoplate-based aptasensor for platelet-derived growth factor detection
Source: Royal Society of Chemistry journal article supplement (doi:10.1039/c6tb00726k), 2016-01-01
Supplement: c6tb00726k1.pdf [file c6tb00726k1.pdf]

Electronic Supplementary Information (ESI) for

## **Multidimensional Hybrid Conductive Nanoplate-Based Aptasensor for Platelet-Derived Growth Factor Detection**

**Jun Seop Lee,<sup>a,b</sup> Wooyoung Kim,<sup>a</sup> Sunghun Cho,<sup>c</sup> Jaemoon Jun,<sup>a</sup> Kyung Hee Cho,<sup>a</sup>  
and Jyongsik Jang<sup>a\*</sup>**

<sup>a</sup> School of Chemical and Biological Engineering, College of Engineering, Seoul National University (SNU), 599 Gwanangno, Gwanak-gu, Seoul, 151-742 (Korea),

<sup>b</sup> Materials Science and Engineering Program and Texas Materials Institute, The University of Texas at Austin, Austin, TX 78712, (USA),

<sup>c</sup> School of Chemical Engineering, Yeungnam University, 280 Daehak-Ro, Gyeongsan 38541, Korea

\* Tel: 82-2-880-8348; Fax: +82-2-888-7295; e-mail: [jsjang@plaza.snu.ac.kr](mailto:jsjang@plaza.snu.ac.kr)

## 1. TEM and HR-TEM images of graphene

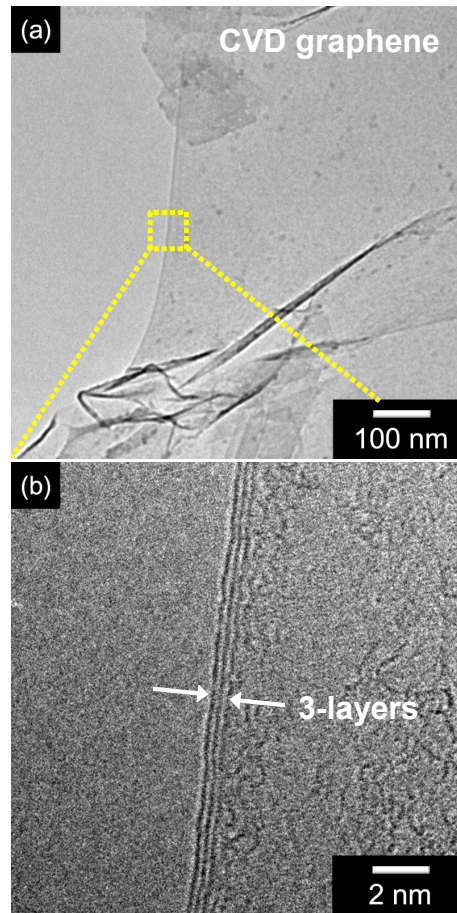

**Fig. S1.** (a) Transmission electron microscopy (TEM) and (b) high-resolution TEM (HR-TEM) images of graphene layer fabricated through chemical vapor deposition (CVD) method.

## 2. Photo images of the sensing electrode

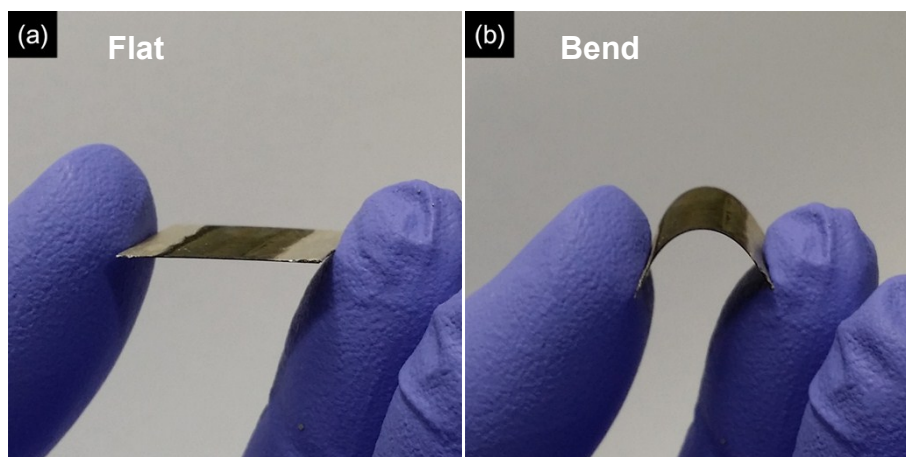

**Fig. S2.** Digital photographs of (a) flat- and (b) bended-MHCPPs-based sensor electrode.

### 3. Selectivity test of the A\_MHCPPs FET sensor

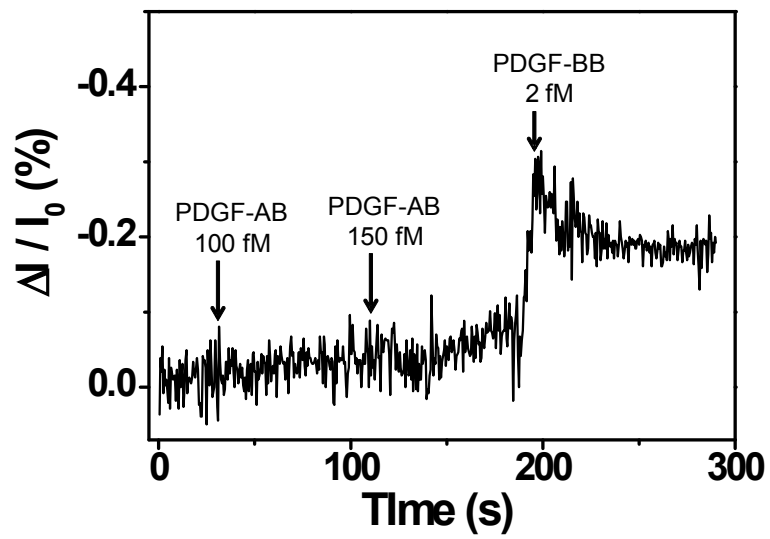

**Fig. S3.** Real-time selective responses of A\_MHCPPs FET sensor at different of analytes (PDGF-AB and PDGF-BB) ( $V_G = 10$  mV,  $V_{SD} = 10$  mV).

#### 4. Sensing performance of the FET sensor after 4 weeks

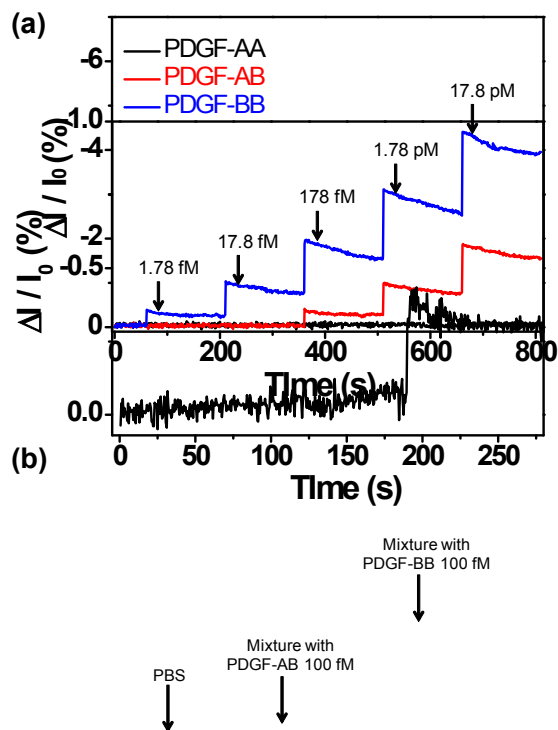

**Fig. S4.** (a) Real-time response of the A\_MHCPPs FET after 4 weeks, with normalized current changes. (b) Selectivity response of the aptamer sensor after 4 weeks towards non-target (ATP, BSA, Cal, PDGF\_AA, and PDGF\_AB) and target analyte (PDGF\_BB) ( $V_G = 10$  mV,  $V_{SD} = 10$  mV).
